# 1 **Sensory neurons control heritable adaptation to stress through** 2 **germline reprogramming**

3 Giusy Zuco<sup>2\*</sup>, Vikas Kache<sup>1\*</sup>, Pedro Robles<sup>2\*</sup>, Jyotiska Chaudhuri<sup>1</sup>, Beth Hill<sup>2</sup>, Christine  
4 Bateson<sup>1</sup>, Andre Pires-daSilva<sup>1,2†</sup>

5 <sup>1</sup>Department of Biology, University of Texas at Arlington, Arlington, TX, 76019, USA. <sup>2</sup>School of  
6 Life Sciences University of Warwick, Coventry, CV4 7AL, UK (A.P.-d.S.).

7 \*Contributed equally

8 †Corresponding author

9

## 10 **Highlights**

- 11 . High population density leads to the production of hermaphrodite offspring.
- 12 . The ASH neuron in the hermaphrodite mother senses population density.
- 13 . Histone modifications in the maternal germline correlate with the sex of offspring.
- 14 . Inhibition of histone demethylases results in female offspring in all conditions.

15

## 16 **Abstract**

17 **Maternal neuronal signaling has been reported to program adaptive changes in offspring**  
18 **physiology in diverse organisms [1, 2]. However, the mechanisms for the inheritance of**  
19 **adaptive maternal effects through the germline are largely unknown. In the nematode**  
20 ***Auanema freiburgensis*, stress-resistance and sex of the offspring depend on**  
21 **environmental cues experienced by the mother. Maternal sensing of high population**  
22 **densities results in the production of stress-resistant larvae (dauer) that develop into**  
23 **hermaphrodites. Ablation of the maternal ASH chemosensory neurons results only in**  
24 **non-dauer offspring that develop into males or females. High population densities**  
25 **correlate with changes in the methylation status of H3K4 and H3K9 in the maternal**  
26 **germline. Inhibition of JMJD histone demethylases prevents mothers from producing**  
27 **dauers and hermaphrodite offspring in high-density conditions. Our results demonstrate**  
28 **a case of soma-to-germline transmission of environmental information that influences**  
29 **the phenotype of the following generation through changes in histone modifications of**  
30 **the maternal germline.**

31

32

33 Mechanisms for passing information about the maternal environment to the offspring evolved in  
34 several organisms. They allow mothers to match the phenotype of their offspring to changes in  
35 local environment, increasing their fitness. For example, mothers of the crustacean *Daphnia*  
36 *cucullata* and of some rotifer species generate predator-resistant offspring when sensing a  
37 predator cue [3, 4], seasonal changes sensed by some insect mothers result in stress-resistant  
38 offspring [5], and high population densities experienced by the red squirrel mother results in  
39 faster growing offspring that are more likely to acquire a territory and survive their first winter [2].  
40 However, the mechanisms involved in the transmission of the environmental information to the  
41 following generation are largely unknown.

42

43 In populations of *Auanema* nematodes, three sexes coexist: XX hermaphrodites, XX females  
44 and XO males [6]. The male sex is chromosomally determined [7, 8], whereas the mechanism  
45 of hermaphrodite versus female sex determination is largely unknown. A crucial factor in the  
46 development of hermaphrodites in this nematode genus is the passage through the stress-  
47 resistant dauer stage [6, 9, 10], which has morphological and behavioral adaptations for  
48 dispersal. In *A. freiburgensis*, XX larvae that pass through the dauer stage always become  
49 hermaphrodites (N= 96), whereas XX non-dauer larvae develop into females (N= 93).

50

51 In *A. freiburgensis*, the environment of the mother determines the sexual fate of the XX  
52 offspring: hermaphrodite individuals kept in isolation produce mostly female offspring  
53 (99.4%  $\pm$  0.6% SE, N= 149 F1 offspring from 10 mothers), whereas hermaphrodites exposed to  
54 high nematode density conditions produce mostly hermaphrodite offspring (86.7%  $\pm$  2.4% SE,  
55 N= 199 F1 offspring from 10 mothers). In these experiments, high-density conditions were  
56 induced by incubating nematodes with conditioned medium (CM) of high-density *A.*  
57 *freiburgensis* liquid cultures (see Methods). Importantly, only the parental generation was  
58 exposed to the conditioned medium. Thus, these results suggest that dauer formation in *A.*  
59 *freiburgensis* is induced across a generation, instead of within the same generation as in  
60 *Caenorhabditis elegans* [11] (Figure 1A). The induction of dauers through the hermaphrodite  
61 mother is limited to one generation: F1 hermaphrodites derived from mothers in (+) CM plates  
62 produce mostly female offspring (99.6%  $\pm$  0.3% SE, N= 470 F2 offspring from 10 F1s).

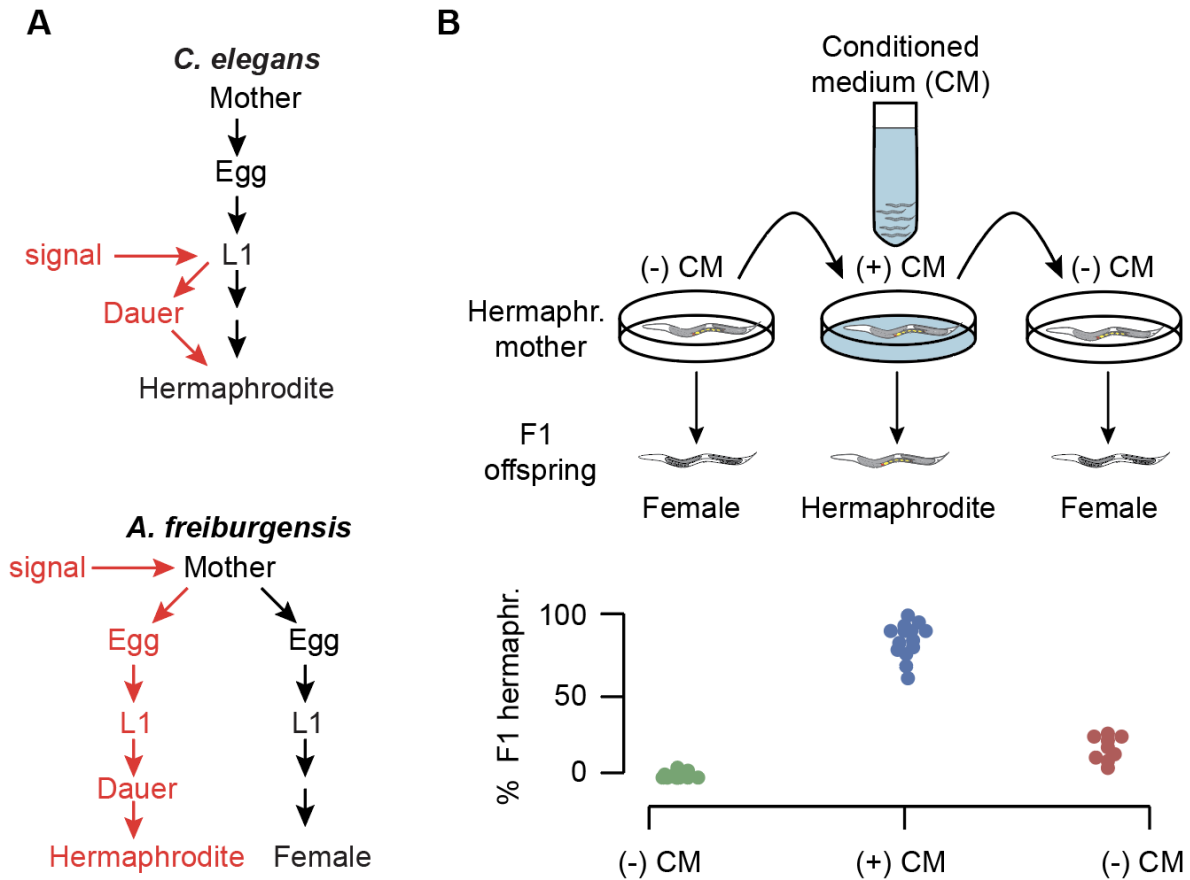

63

64 **Figure 1.** Dauer and hermaphrodite development are induced across generations in *A.*

65 *freiburgensis*. **A.** In *C. elegans*, the L1 larvae respond to environmental signals to facultatively

66 form stress-resistant dauers. *A. freiburgensis*, it is the mother and not the L1s that respond to

67 environmental signals. *A. freiburgensis* dauers larvae obligatorily develop into hermaphrodite

68 adults. **B.** In the experimental setup (top), the same individual mother hermaphrodite was

69 transferred every 24 hours to a new environmental condition. Initially, it was placed in a plate

70 without conditioned medium (-) CM, followed by the transfer to a (+) CM plate and then to a new

71 (-) CM plate. The sex of the offspring was then assessed. Mothers (N= 14) kept in a (-) CM plate

72 produced 1.7% of hermaphrodites (N total offspring= 386). When the same mothers (N= 14)

73 were transferred to a (+) CM plate, they generated a mean of 83% of F1 hermaphrodites (N

74 total offspring= 415). After transferring back to a new (-) CM plate, mothers (N= 10, 4 died)

75 produced 17% F1 hermaphrodites (N total offspring= 364).

76

77 To test if *A. freiburgensis* L1 larvae can also respond to crowding conditions, similar to *C.*

78 *elegans* L1 larvae, eggs derived from mothers cultured in isolation were left to hatch and

79 undergo larval development in (+) CM plates until adulthood. 95.7% (N= 161) of these L1s  
80 developed into females, indicating that larvae do not respond to crowding conditions.

81  
82 To determine if the CM affects dauer formation and sex determination in a reversible manner,  
83 individual mothers were tested in different conditions throughout their lives (Figure 1B). Eggs  
84 laid by hermaphrodites on (-) CM plates developed into females. When the same adult  
85 individuals were transferred to (+) CM plates, the offspring were mostly hermaphrodite. After  
86 rinsing the same mothers with M9 buffer and placing them onto a new (-) CM plate for about 24  
87 hours, most offspring developed into females again. These results indicate that a hermaphrodite  
88 mother can reversibly respond to the environmental conditions.

89  
90 When cultured for 6 hours, a minimum density of 16 adult hermaphrodites per cm<sup>2</sup> is sufficient  
91 for the induction of 100% (N= 295) of hermaphrodite offspring. In densities below 10  
92 individuals/cm<sup>2</sup>, the hermaphrodite mothers produce practically only female offspring (10  
93 individuals/cm<sup>2</sup>, 100% F1 female, N= 78; 6 individuals/cm<sup>2</sup>, 98.5% F1 female, N= 66). At an  
94 intermediate density (13 individuals/cm<sup>2</sup>), hermaphrodites produce 19% (N= 126) of  
95 hermaphrodite offspring.

96  
97 In *C. elegans*, other environmental stresses, such as incubation at high temperature (25 °C) or  
98 lack of food, can induce L1s to develop into dauers [11]. However, a 24-hour exposure of *A.*  
99 *freiburgensis* hermaphrodite mothers to high temperature or starvation resulted in mostly (97%)  
100 non-dauer larvae offspring that developed into female adults, for both conditions (N= 166 F1s  
101 from mothers at 25 °C and N= 146 F1s from starving mothers).

102  
103 Nematodes have bilateral pairs of sensory organs in the head called amphids. In *C. elegans*,  
104 some of these amphid neurons are necessary to sense the environment and regulate dauer  
105 development [12]. To test if this was also the case for *A. freiburgensis* adults, we first identified  
106 each amphid. Amphid neurons have open sensory endings and thus take up lipophilic dyes  
107 such as Dil from the environment, allowing the visualization of their cell bodies [13]. Based on  
108 their relative position and by using *C. elegans* and other nematodes as reference [14], we  
109 identified ASK, ADL and ASH as the amphids that stain with Dil in *A. freiburgensis* (Figure 2A).  
110 We systematically ablated each pair type by using a laser microbeam. Laser ablation of the two  
111 ASH neurons in the mother hermaphrodite kept in a (+) CM plate was sufficient to prevent the  
112 production of dauer and hermaphrodite offspring (Figure 2B).

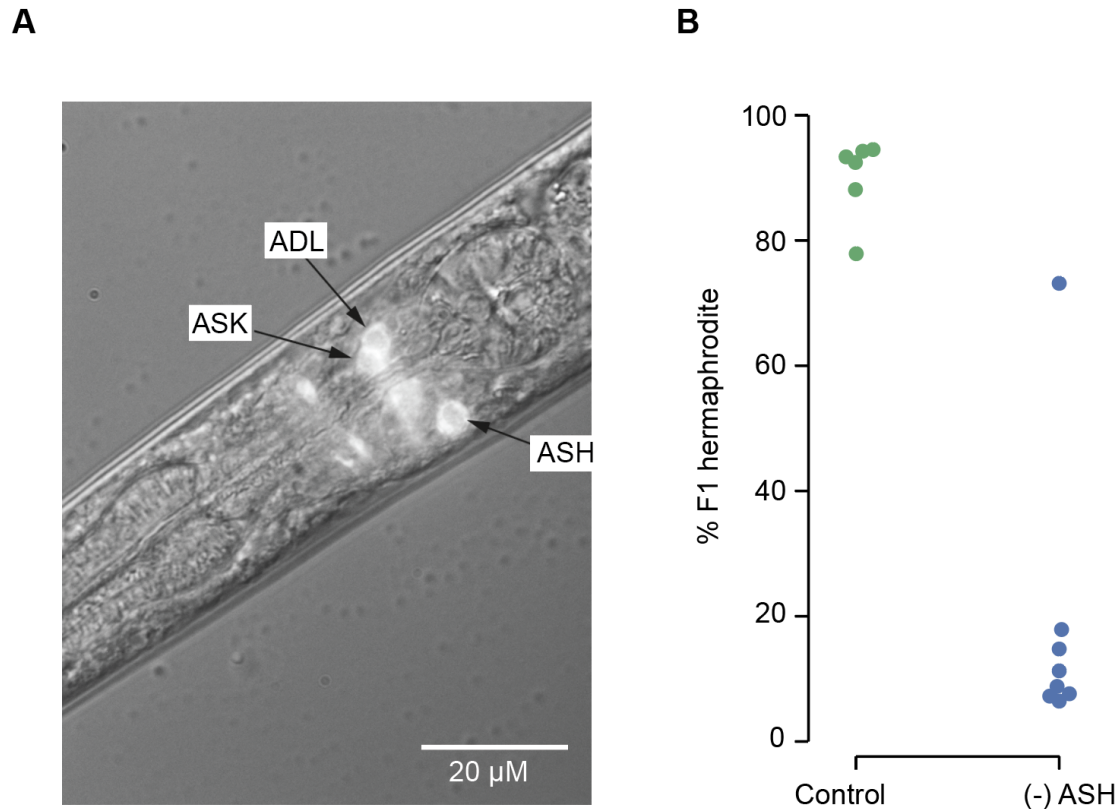

113  
114 **Figure 2.** Killing of the neuronal pair ASH by laser ablation prevents the mother from producing  
115 hermaphrodite offspring. **A.** Amphid neurons stained with Dil were identified by the relative  
116 location of their cell bodies. **B.** When cultured in (+) CM plates, mock-ablated hermaphrodites  
117 (N= 6) generate mostly hermaphrodite offspring (90%, N total offspring= 553). In contrast,  
118 hermaphrodites in which both ASH neurons were ablated (N= 8) and kept in (+) CM plates,  
119 produced fewer hermaphrodite offspring (18%, N total offspring= 664). The outlier that produced  
120 a high proportion of hermaphrodite F1s is likely to be an animal in which only one of the ASH  
121 neurons was successfully ablated.

### 122 123 **Changes in histone modifications in the germline correlate with exposure to crowding** 124 **conditions**

125 To test if exposure of *A. freiburgensis* hermaphrodites to CM changes the epigenetic status of  
126 the chromatin and thus transcriptional activity in the germline, we performed antibody staining to  
127 detect histone modifications. We examined histone modifications that result in the methylation of  
128 lysine (K) residues of the histones 3 (H3) and 4 (H4) [15]. Similarly to *C. elegans* [16], the distal  
129 tip of the *A. freiburgensis* germline is mitotically active, whereas the remaining cells undergo  
130 meiosis. In gonads isolated from hermaphrodites grown in (-) CM plates, most animals have

131 uniform levels of H3K4me3 (100%, N= 44 gonads) and H3K9me3 (73%, N= 67) throughout the  
132 germline (Figure 3). In gonads derived from animals in (+) CM plates, we observed clustered  
133 cells with high levels of H3K4me3 (76.3%, N= 59) and low levels of H3K9me3 (81%, N= 91) in  
134 the mitotic region (Figure 3).  
135

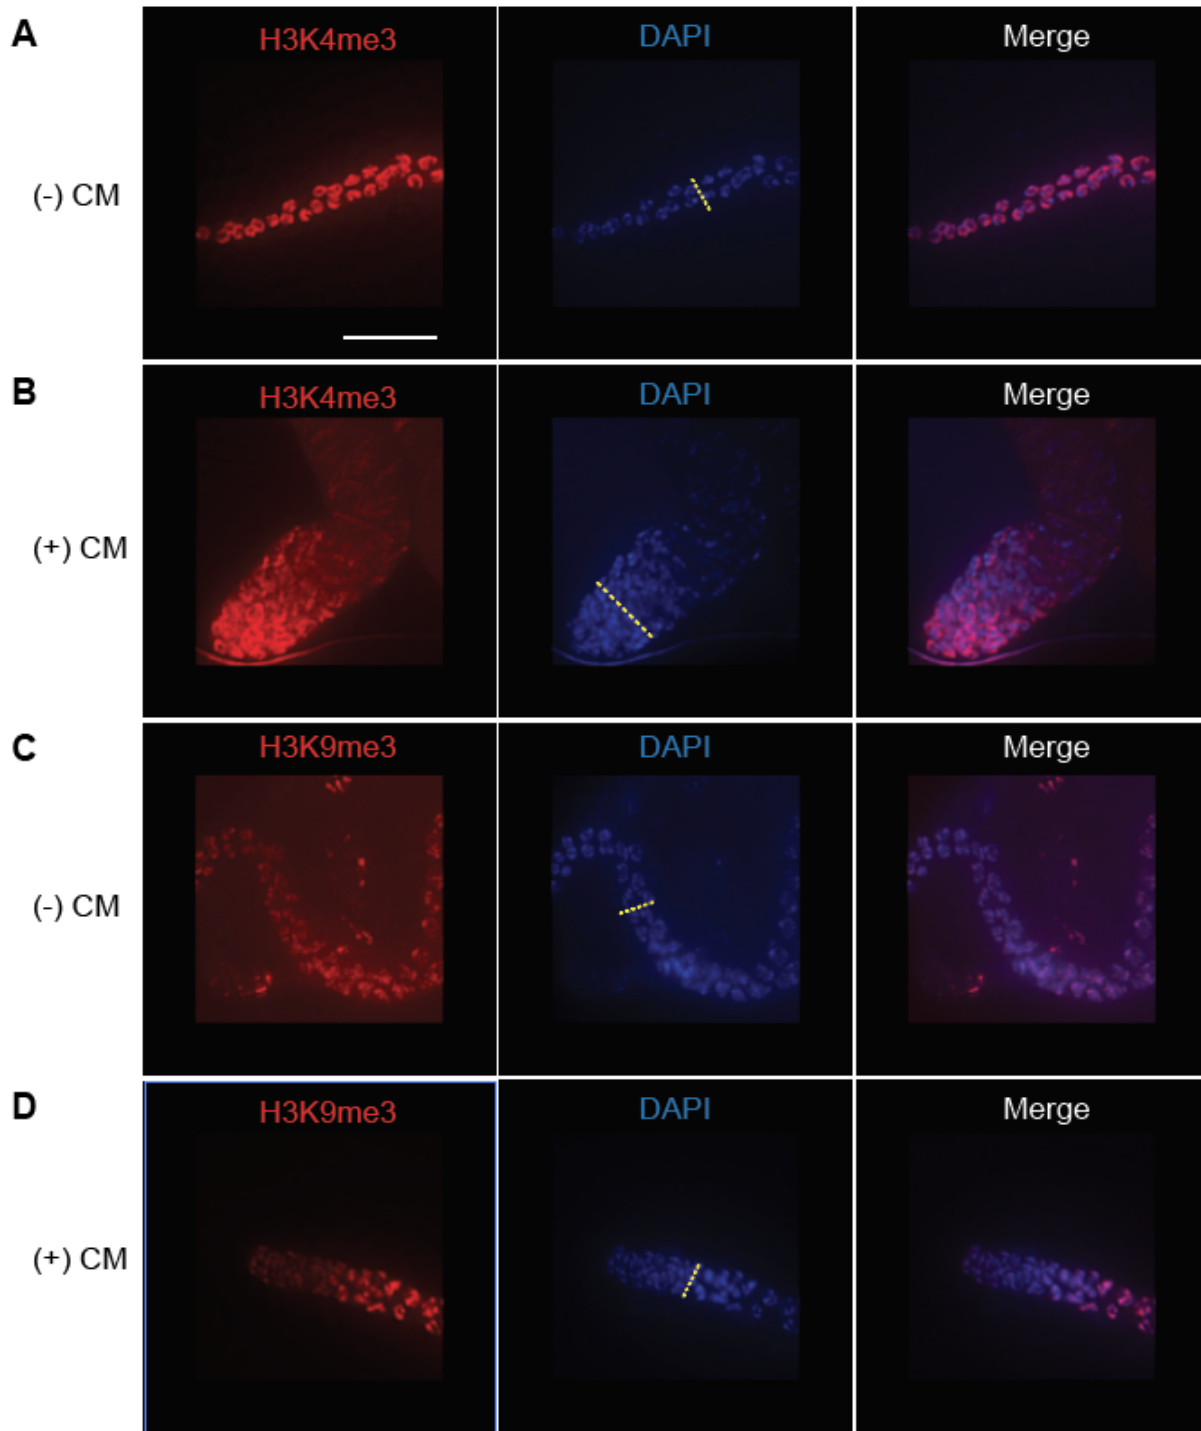

136

137 **Figure 3.** Histone methylation patterns change when hermaphrodite mothers are in (+) CM  
138 plates. When cultured in the (-) CM plates, hermaphrodites have homogeneous levels of  
139 H3K4me3 (**A**) and H3K9me3 (**B**) along the germline. When cultured in (+) CM plates, there is a  
140 higher level of H3K4me3 (**C**) and lower levels of H3K9me3 (**D**) in the tip of the gonad. The



141 yellow dotted line in the pictures with DAPI staining represents the border between the mitotic  
142 and meiotic part of the germline. The mitotic and meiotic part of the gonad is to the left and the  
143 right of the yellow dotted line, respectively. Scale bar= 15  $\mu$ m.

144

145 To test if those histone modifications have functional relevance, we used an inhibitor of Jumonji  
146 demethylases involved in H3K9me3 demethylation [17, 18]. The prediction is that treatment of  
147 animals with the KDM4/JMJD-2 inhibitor IOX-1 [18] would increase the rate of H3K9me3 in  
148 animals exposed to CM. This would reflect in lower number of hermaphrodites produced when  
149 mothers are exposed to CM. Accordingly, we found that most mothers treated with CM and 1  
150  $\mu$ M IOX-1 have higher levels of H3K9me3 (57.1%, N= 7 gonads) and lower levels of H3K4me3  
151 (64.7%, N= 17 gonads) in the mitotic region (Supplementary Figure S1). They also produced  
152 mostly females (68%, N= 341 sexed F1s). In control experiments, in which hermaphrodites  
153 were treated only with CM, they produced mostly hermaphrodites (82%, N= 45 sexed F1s).

154

155 There are many examples of non-genetic mechanisms that induce phenotypes across  
156 generations [3, 19-21]. However, it is often difficult to determine whether offspring phenotypes  
157 are a passive consequence of resource availability to the parental generation or the result of an  
158 adaptive response across generations [20]. Furthermore, the mechanisms of transducing an  
159 environmental signal from the parental generation to the offspring are largely unknown. Here we  
160 show an example of intergenerational adaptive response that is induced in anticipation of a  
161 changing environment. The neuronal transduction of an environmental signal correlates with  
162 changes in chromatin modifications status in the parental germline, resulting in offspring with  
163 alternative phenotypes.

164

165 Phenotypic plasticity across generations is predicted to evolve when local environments can be  
166 anticipated, thus providing a means for the mother to adjust the phenotype of the offspring to  
167 enhance their success in that environment [22-24]. Although the ecology of *A. freiburgensis* is  
168 not known, a strain of this species (JU1782) has been isolated from rotting plant stems, which is  
169 similar to the *C. elegans* habitat [25]. In this environment, it is common a “boom-and-bust” type  
170 of lifestyle, characterized by rapid consumption of food sources and population growth, followed  
171 by a period of dispersal. Chemosensation of the environment by the nematode *A. freiburgensis*  
172 determines the developmental trajectory and sex of the F1 generation. Since *A. freiburgensis*  
173 dauers are migratory and develop into selfing hermaphrodites, colonizer individuals assure  
174 propagation in the new habitats even in the absence of conspecific males.



175

176 The chemosensory ASH neurons do not connect directly to the germline. Thus, it is likely that  
177 the endogenous signaling from sensory neurons to the germline is mediated by some  
178 neuroendocrine messenger that directly or indirectly affect the epigenetic status of the mitotic  
179 germline. The exposure of hermaphrodites to high-density conditions leads to higher levels of  
180 H3K4me3 and lower levels of H3K9me3, and correlates with higher transcription rates [15]. It  
181 remains to be determined which genes are activated and how they affect the change in sex  
182 determination of the offspring. Changes in the transcription of germline genes in response to  
183 environmental stimuli has been recently demonstrated in mammals as well [26, 27].

184

185 Although there is considerable variation in the neuroanatomy of nematodes [28], *Auanema* and  
186 *Caenorhabditis* are morphologically similar and phylogenetically close enough [6, 29] to make  
187 the identification of amphid neuron homologs relatively easily. In *C. elegans* and other  
188 nematodes of the Eurhabditis clade, the ASH neuron is a nociceptor that mediates avoidance  
189 behavior to harmful stimuli [14, 30, 31] and has been recently implicated in dauer induction [32].  
190 Differences in dauer formation between *C. elegans* and *A. freiburgensis* (within and across  
191 generations, respectively) could be due to the expression of particular neurotransmitters in  
192 homolog neurons [33, 34]. Future comparative studies with closely related species will reveal  
193 how mechanisms of intergenerational inheritance evolved.

## 194 **Acknowledgements**

195 A.P.-d.S. acknowledges funding by the National Science Foundation (IOS1122095), BBSRC  
196 (BB/L019884/1) and Leverhulme Trust (RPG-2016-089). We thank Nick Burton for critically  
197 reading the manuscript.

## 198 **Author contributions**

199 G.Z., V.K., P.R. and A.P.-d.S.. designed the study. G.Z, V.K., J.C., C.B. and B.H. conducted  
200 experiments that involved the production of conditioned medium, crosses, and sexing offspring.  
201 G.Z. and V.K. performed laser ablations and P.R. performed the immunocytochemistry  
202 experiments. G.Z., V.K., P.R. and A.P.-d.S. wrote the paper.

203

## 204 **Author Information**

205 The authors declare no competing interests. Correspondence and requests for materials should  
206 be addressed to A.P.-d.S. ([andre.pires@warwick.ac.uk](mailto:andre.pires@warwick.ac.uk)).

207

## 208 **References**

- 209 1. Burton, N.O., Furuta, T., Webster, A.K., Kaplan, R.E.W., Baugh, L.R., Arur, S., and  
210 Horvitz, H.R. (2017). Insulin-like signalling to the maternal germline controls progeny  
211 response to osmotic stress. *Nature Cell Biology* 19, 252.
- 212 2. Dantzer, B., Newman, A.E., Boonstra, R., Palme, R., Boutin, S., Humphries, M.M., and  
213 McAdam, A.G. (2013). Density triggers maternal hormones that increase adaptive  
214 offspring growth in a wild mammal. *Science* 340, 1215-1217.
- 215 3. Agrawal, A.A., Laforsch, C., and Tollrian, R. (1999). Transgenerational induction of  
216 defences in animals and plants. *Nature* 401, 60-63.
- 217 4. Gilbert, J.J. (2017). Non-genetic polymorphisms in rotifers: environmental and  
218 endogenous controls, development, and features for predictable or unpredictable  
219 environments. *Biol Rev Camb Philos Soc* 92, 964-992.
- 220 5. Mousseau, T.A., and Dingle, H. (1991). Maternal effects in insect life histories. *Annual*  
221 *Review of Entomology* 36, 511-534.
- 222 6. Kanzaki, N., Kiontke, K., Tanaka, R., Hirooka, Y., Schwarz, A., Muller-Reichert, T.,  
223 Chaudhuri, J., and Pires-daSilva, A. (2017). Description of two three-gendered  
224 nematode species in the new genus *Auanema* (Rhabditina) that are models for  
225 reproductive mode evolution. *Sci Rep* 7, 11135.
- 226 7. Shakes, D.C., Neva, B.J., Huynh, H., Chaudhuri, J., and Pires-daSilva, A. (2011).  
227 Asymmetric spermatocyte division as a mechanism for controlling sex ratios. *Nat*  
228 *Commun* 2, 157.
- 229 8. Tandonnet, S., Farrell, M.C., Koutsovoulos, G.D., Blaxter, M.L., Parihar, M., Sadler, P.L.,  
230 Shakes, D.C., and Pires-daSilva, A. (2018). Sex- and gamete-specific patterns of X  
231 chromosome segregation in a trioecious nematode. *Curr Biol* 28, 93-99 e93.
- 232 9. Félix, M.A. (2004). Alternative morphs and plasticity of vulval development in a rhabditid  
233 nematode species. *Dev Genes Evol* 214, 55-63.
- 234 10. Chaudhuri, J., Kache, V., and Pires-daSilva, A. (2011). Regulation of sexual plasticity in  
235 a nematode that produces males, females, and hermaphrodites. *Curr Biol* 21, 1548-  
236 1551.
- 237 11. Cassada, R.C., and Russell, R.L. (1975). The dauerlarva, a post-embryonic  
238 developmental variant of the nematode *Caenorhabditis elegans*. *Dev Biol* 46, 326-342.

- 239 12. Bargmann, C.I., and Horvitz, H.R. (1991). Control of larval development by  
240 chemosensory neurons in *Caenorhabditis elegans*. *Science* 251, 1243-1246.
- 241 13. Hedgecock, E.M., Culotti, J.G., Thomson, J.N., and Perkins, L.A. (1985). Axonal  
242 guidance mutants of *Caenorhabditis elegans* identified by filling sensory neurons with  
243 fluorescein dyes. *Dev Biol* 111, 158-170.
- 244 14. Srinivasan, J., Durak, O., and Sternberg, P.W. (2008). Evolution of a polymodal sensory  
245 response network. *BMC Biol* 6, 52.
- 246 15. Kouzarides, T. (2007). Chromatin modifications and their function. *Cell* 128, 693-705.
- 247 16. Hansen, D., and Schedl, T. (2013). Stem cell proliferation versus meiotic fate decision in  
248 *Caenorhabditis elegans*. *Adv Exp Med Biol* 757, 71-99.
- 249 17. Feng, T., Li, D., Wang, H., Zhuang, J., Liu, F., Bao, Q., Lei, Y., Chen, W., Zhang, X., Xu,  
250 X., et al. (2015). Novel 5-carboxy-8-HQ based histone demethylase JMJD2A inhibitors:  
251 introduction of an additional carboxyl group at the C-2 position of quinoline. *Eur J Med*  
252 *Chem* 105, 145-155.
- 253 18. King, O.N., Li, X.S., Sakurai, M., Kawamura, A., Rose, N.R., Ng, S.S., Quinn, A.M., Rai,  
254 G., Mott, B.T., Beswick, P., et al. (2010). Quantitative high-throughput screening  
255 identifies 8-hydroxyquinolines as cell-active histone demethylase inhibitors. *PLoS One* 5,  
256 e15535.
- 257 19. Jablonka, E. (2013). Epigenetic inheritance and plasticity: The responsive germline.  
258 *Prog Biophys Mol Biol* 111, 99-107.
- 259 20. Youngson, N.A., and Whitelaw, E. (2008). Transgenerational epigenetic effects. *Annu*  
260 *Rev Genomics Hum Genet* 9, 233-257.
- 261 21. Bonduriansky, R., and Day, T. (2009). Nongenetic inheritance and its evolutionary  
262 implications. *Annu Rev Ecol Evol Syst* 40, 103-125.
- 263 22. Uller, T. (2008). Developmental plasticity and the evolution of parental effects. *Trends*  
264 *Ecol Evol* 23, 432-438.
- 265 23. Proulx, S.R., and Teotonio, H. (2017). What kind of maternal effects can be selected for  
266 in fluctuating environments? *Am Nat* 189, E118-E137.
- 267 24. Russell, B., and J., C.A. (2018). What are parental condition-transfer effects and how  
268 can they be detected? *Methods in Ecology and Evolution* 9, 450-456.
- 269 25. Félix, M.A., and Duvéau, F. (2012). Population dynamics and habitat sharing of natural  
270 populations of *Caenorhabditis elegans* and *C. briggsae*. *BMC Biol* 10, 59.

- 271 26. Chen, Q., Yan, M., Cao, Z., Li, X., Zhang, Y., Shi, J., Feng, G.H., Peng, H., Zhang, X.,  
272 Zhang, Y., et al. (2016). Sperm tsRNAs contribute to intergenerational inheritance of an  
273 acquired metabolic disorder. *Science* 351, 397-400.
- 274 27. Sharma, U., Conine, C.C., Shea, J.M., Boskovic, A., Derr, A.G., Bing, X.Y., Belleannee,  
275 C., Kucukural, A., Serra, R.W., Sun, F., et al. (2016). Biogenesis and function of tRNA  
276 fragments during sperm maturation and fertilization in mammals. *Science* 351, 391-396.
- 277 28. Han, Z., Boas, S., and Schroeder, N.E. (2015). Unexpected variation in neuroanatomy  
278 among diverse nematode species. *Front Neuroanat* 9, 162.
- 279 29. Kiontke, K., Barriere, A., Kolotuev, I., Podbilewicz, B., Sommer, R., Fitch, D.H., and  
280 Félix, M.A. (2007). Trends, stasis, and drift in the evolution of nematode vulva  
281 development. *Curr Biol* 17, 1925-1937.
- 282 30. Bargmann, C.I., and Horvitz, H.R. (1991). Chemosensory neurons with overlapping  
283 functions direct chemotaxis to multiple chemicals in *C. elegans*. *Neuron* 7, 729-742.
- 284 31. Hilliard, M.A., Apicella, A.J., Kerr, R., Suzuki, H., Bazzicalupo, P., and Schafer, W.R.  
285 (2005). In vivo imaging of *C. elegans* ASH neurons: cellular response and adaptation to  
286 chemical repellents. *Embo J* 24, 63-72.
- 287 32. Neal, S.J., Park, J., DiTirro, D., Yoon, J., Shibuya, M., Choi, W., Schroeder, F.C.,  
288 Butcher, R.A., Kim, K., and Sengupta, P. (2016). A forward genetic screen for molecules  
289 involved in pheromone-induced dauer formation in *Caenorhabditis elegans*. *G3*  
290 (Bethesda) 6, 1475-1487.
- 291 33. Schafer, W. (2016). Nematode nervous systems. *Curr Biol* 26, R955-R959.
- 292 34. Sithigorngul, P., Jarecki, J.L., and Stretton, A.O.W. (2011). A specific antibody to  
293 neuropeptide AF1 (KNEFIRFamide) recognizes a small subset of neurons in *Ascaris*  
294 *suum*: differences from *Caenorhabditis elegans*. *The Journal of comparative neurology*  
295 519, 1546-1561.
- 296 35. Stiernagle, T. (2006). Maintenance of *C. elegans*. *WormBook*, 1-11.
- 297 36. Greer, E.L., Beese-Sims, S.E., Brookes, E., Spadafora, R., Zhu, Y., Rothbart, S.B.,  
298 Aristizabal-Corrales, D., Chen, S., Badeaux, A.I., Jin, Q., et al. (2014). A histone  
299 methylation network regulates transgenerational epigenetic memory in *C. elegans*. *Cell*  
300 *Rep* 7, 113-126.

301

## 302 **Supplementary Materials**

## 303 **Methods**

### 304 **Strain and culture**

305 Unless otherwise stated, we used *A. freiburgensis* strain SB372 throughout this study [6]. The  
306 strain JU1782 was isolated from rotting *Petasites* stems sampled in Ivry (Val-de-Marne),  
307 France, in September 2009 by Marie-Anne Félix. Nematodes were cultured at 20 °C on  
308 standard Nematode Growth Medium (NGM) [35] plates seeded with the *Escherichia coli* OP50-1  
309 strain. Microbial contamination was prevented by adding 25 µg/mL nystatin and 50 µg/mL  
310 streptomycin to the NGM.

311

### 312 **Isolation of age-synchronized hermaphrodite adults**

313 To obtain adult hermaphrodites of about the same age, we relied on the finding that every *A.*  
314 *freiburgensis* dauer develops into a hermaphrodite. When many young hermaphrodites were  
315 required, crowded culture plates were treated with 1% sodium dodecyl sulfate (SDS) [11]. After  
316 this treatment, only dauer larvae remain alive. The treatment consisted of first resuspending  
317 nematodes in 2 ml of water for each plate. They were then transferred to 15 ml tubes and  
318 sedimented by centrifugation at 3,500 rpm for 3 minutes. After discarding the supernatant, 10 ml  
319 of 1% SDS was added to each tube. Nematodes were incubated in SDS at room temperature  
320 for 30 minutes, after which they were sedimented by centrifugation at 3,500 rpm for 3 minutes.  
321 10 ml of water was added to each tube, and nematodes were resuspended and centrifuged at  
322 3,500 rpm for 3 minutes. Dauers were transferred to a freshly seeded 6 cm plate and left to  
323 crawl out of the carcasses and debris. For isolation of a small number of young hermaphrodites,  
324 dauers were isolated from an overcrowded plate. They can easily recognized by their nictation  
325 behavior, in which they stand on their tails and wave their bodies.

326

### 327 **Sexing of offspring**

328 To determine the sex of the F1 from selfing hermaphrodites, the hermaphrodite mothers were  
329 selected by first isolating dauers, which in *A. freiburgensis* always develop into hermaphrodites.  
330 Each dauer was placed on a 6 cm seeded NGM plate and kept at 20 °C to develop into an  
331 adult. Eggs laid by the hermaphrodite mother were collected and placed onto 96-well plates and  
332 left to develop until adulthood. Hermaphrodites were distinguished by their ability to produce  
333 offspring in the absence of a mating partner. Females typically lay unfertilized oocytes, and  
334 males are identified by their blunt tails [6]. When reporting sex percentages, we considered only  
335 the XX offspring (hermaphrodites or females).

336

337 **Production of conditioned medium from high-density nematode cultures**

338 Plates of *A. freiburgensis* on NGM (with *Escherichia coli* OP50-1) were grown for ca. 6 days (20  
339 °C) until a high population density was reached (usually considered > 1,000 nematodes/cm<sup>2</sup>)  
340 and washed with M9 medium [35] (10 ml, supplemented with 25 µg/mL nystatin) into a 1,500 ml  
341 flask. This procedure was repeated with several plates over 3 weeks, until 1,000 ml of liquid  
342 culture was produced. The liquid culture was during that time incubated on a rotary shaker at 22  
343 °C and 100 rpm. Contamination was prevented by adding 25 µg/ml nystatin to the medium.  
344 Subsequently, the culture was centrifuged to sediment nematodes and bacteria, and the  
345 conditioned medium was collected and freeze-dried.

346

347 **Assay with conditioned medium**

348 To test if *A. freiburgensis* hermaphrodites respond to environmental signals to produce different  
349 types of offspring, they were cultured in isolation either in the presence or absence of  
350 conditioned medium (prepared as described above). First, young hermaphrodite mothers were  
351 isolated by treating nematode culture plates with 1% sodium dodecyl sulfate (SDS), as  
352 described above. Dauers were placed into 6 cm plates seeded with *E. coli* OP50-1 for 22-24  
353 hours and left to develop until the L4 larval stage. In assays with conditioned medium, each L4  
354 hermaphrodite was placed into a 6 cm plate containing freeze-dried conditioned medium  
355 powder (50 mg), dissolved in 200 µl *E. coli* OP50-1 medium. After overnight incubation at 20 °C,  
356 eggs were collected and washed with 200-300 µl of M9. Each egg was then moved to a single  
357 well of a 96-well microtiter plate, in which each well contained 100 µl of NGM seeded with *E.*  
358 *coli*. Sex of the offspring was scored as described in the previous section. Each assay with the  
359 conditioned medium was performed side by side with a control (L4 hermaphrodite cultured in  
360 the absence of conditioned medium).

361

362 In the experiment to test if mothers react sense crowding cues, L4 animals (N= 10) were placed  
363 on 6 cm seeded plates with or without conditioned medium and left to develop to adulthood and  
364 to lay eggs for 16 hours. A total of 149 and 199 F1 offspring were sexed in the absence and  
365 presence of conditioned medium, respectively. In the test for induction of dauers for more than  
366 one generation, each of the F1 (N= 3) hermaphrodites were placed on single plates and the  
367 brood produced overnight was sexed after they developed into adults (N= 141 F2s).

368

369 To address whether L1 larvae can respond to conditioned medium, dauers were placed on a 6  
370 cm plate seeded with *E. coli* for 22-24 hours. Each resultant L4 hermaphrodite was transferred



371 to one 6 cm seeded plate and left to lay eggs. The offspring (at L1 stage) were placed onto 6 cm  
372 plates containing conditioned medium (as described above) and left to develop until adulthood,  
373 when they were scored for their sexual identity.

374

#### 375 **Determining the minimum density of nematodes to induce hermaphrodite offspring**

376 Young hermaphrodite adults were placed in 6 cm NGM plate seeded with *E. coli* OP50-1 lawn  
377 (0.7 cm radius). After 6 hours at 20 °C, the adult mothers were removed from the plate. Eggs  
378 were allowed to develop and were sexed as above. This experiment was performed in triplicate  
379 and the number of mothers tested were 10, 15, 20, 25 and 30.

380

#### 381 **Effect of temperature and starvation**

382 To test the effect of temperature stress (25 °C) and starvation on the mother to induce dauer  
383 and hermaphrodite development, dauers were picked from a 6 cm agar plate spotted with a  
384 ~5 mm diameter *E. coli* OP50-1 lawn that was kept at 20 °C. At early L4 stage each worm was  
385 moved to a 6 cm NMG plate spotted with *E. coli* OP50-1 and incubated at 25 °C or in the  
386 absence of food. Laid eggs were moved to a single well of a 96-well plate and incubated at 20  
387 °C to allow them to develop into adults. Sexes of the offspring were determined as above.

388

#### 389 **Dil staining**

390 The red fluorescent lipophilic cationic indocarbocyanine dye Dil (1,1'-dioctadecyl- 3,3,3',3'-  
391 tetramethylindocarbocyanine perchlorate) (Molecular Probes - stock dye in dimethyl formamide  
392 solution containing 2 mg/ml (2 mM), was used to identify the amphid neurons. Hermaphrodites  
393 at L4 stage were washed from plates twice using M9 buffer [35], resuspended in 1 mL of M9  
394 containing 8 µl Dil stock solution (1:125 final dilution) and incubated on a slow shaker at room  
395 temperature for at least 3 hours in the dark. After the incubation, nematodes were washed twice  
396 with M9 buffer to remove residual dye. Nematodes were then moved to a fresh NGM plate and  
397 were left to crawl on the bacterial lawn for at least 1 hour to allow clearance of ingested dye  
398 from their digestive tracts.

399

#### 400 **The identification and ablation of amphids**

401 A drop of melted 3% agarose was placed on a slide and flattened into a pad. Two slides  
402 containing spacers were used as guides for flattening the agar, so the thickness of the agar pad  
403 was equal to that of the spacer layer. In order to immobilize nematodes for imaging and surgery,  
404 sodium azide (an inhibitor of mitochondrial respiration) at a final concentration of 0.1 M was



405 used in the agar pad. Nematodes were placed onto a drop of anesthetic (sodium azide) and a  
406 coverslip was placed on the slide. Care was taken to avoid creating bubbles next to the  
407 nematodes, as air-water interfaces can interfere with imaging and laser surgery.

408  
409 Amphid neurons were identified according to the position of the cells viewed under Nomarski  
410 optics (Zeiss Axio Observer.Z1), using the appropriate filters (Dil gives red fluorescence). For  
411 ablation a diode laser-pumped pulsed dye laser (Micropoint laser ablation system, Andor) was  
412 used. According to the supplier, this laser unit generates a laser beam with peak wavelength of  
413 435 nm, pulse energy up to 50  $\mu$ J, peak power 12 kW (average power 750  $\mu$ W), peak duration  
414 3-5 ns, pulse repetition rate 0-15 Hz. To confirm that a damage had occurred, features such as  
415 difference in the morphology of the cell before and after ablation and the change of refractive  
416 index in the nucleus were taken into consideration. Loss of fluorescence of the ablated cell was  
417 not considered sufficient to assume that a damage was induced, since this can be merely due to  
418 a photobleaching mechanism.

419  
420 To rescue nematodes, the coverslip was removed from the slide very gently and 200  $\mu$ l of M9  
421 were used to move the worm to a seeded (*E. coli* OP50-1) NGM plate (25  $\mu$ g/mL nystatin, 50  
422  $\mu$ g/mL streptomycin). Since nematodes were very dehydrated at this point, they were allowed to  
423 recover for 2 or 3 hours before proceeding with subsequent biological assays.

424  
425 For the biological assay, each ablated L4 hermaphrodite was moved to a 6 cm plate containing  
426 freeze-dried supernatant powder (50 mg) dissolved in 200  $\mu$ l of an overnight culture of *E. coli*  
427 OP50-1 in LB medium supplemented with 50  $\mu$ g/mL streptomycin. Non-hatched eggs that were  
428 laid during the night were collected and were washed with 200-300  $\mu$ l of M9 buffer. Each egg  
429 was moved to a single well of a 96-well microtiter plate (100  $\mu$ l NGM per well). Sex of the F1  
430 offspring was identified by checking for F2 offspring to determine if hermaphrodite, dead  
431 oocytes to determine if female and tail morphology for male determination. The procedure for  
432 mock ablations was identical (sodium azide treatment, fluorescent illumination, time in slide),  
433 except that no neuron was ablated.

434

### 435 **Gonads Immunohistochemistry procedures**

436 Hermaphrodites at L4 stage were placed on a 6 cm NGM plate containing 50 mg of conditioned  
437 medium. After 24-36 hours, gonads were dissected on a slide (Superfrost microscope slide,  
438 VWR) in M9 buffer (22 mM  $\text{KH}_2\text{PO}_4$ , 34 mM  $\text{K}_2\text{HPO}_4$ , 86 mM NaCl, 1 mM  $\text{MgSO}_4$ ) and

439 dissected gonads were fixed and treated with PBST (PBS + 0.05% Tween-20) and PBST +  
440 0.5% BSA as a previously described [36]. Mouse primary antibodies to H3K9me3 (gift from Dr.  
441 H Kimura from Tokyo Institute of Technology) and H3K4me3 (CMA304, from Millipore 05-1339-  
442 S) were applied at a 1:2,000 dilution in PBST and incubated at room temperature overnight.  
443 Slides were washed twice in PBST for 10 minutes and a secondary antibody (goat, anti-mouse  
444 Alexa 478, Invitrogen) was applied at a 1:100 dilution in PBST for 2 hours at room temperature.  
445 Slides were washed in PBST as above to remove the excess of secondary antibody and then  
446 one drop of Fluoroshield Mounting Medium with DAPI (from Abcam ab104139) was added on  
447 the immunostained samples. Controls were not exposed to conditioned medium before  
448 performing gonad dissection and immunostaining. Images were taken with a 60X objective in  
449 2.40  $\mu\text{m}$  z stack intervals (12 sections) with a Deltavision microscope (Olympus).

450

#### 451 **Treatment with IOX-1**

452 For treatment with 5-carboxy-8-hydroxyquinoline (IOX-1, abcam ab144394), young adults  
453 nematodes were transferred and incubated for 24-48 hr in NGM plates containing IOX-1. IOX-1,  
454 previously diluted in dimethyl sulfoxide (DMSO) at 1  $\mu\text{M}$  final concentration, was added to  
455 seeded NGM plates. Afterwards, nematodes were dissected as indicated in immunostaining  
456 protocol. Controls contained no IOX-1, but DMSO. To check IOX-1 effects in offspring, a single  
457 young adult was transferred to an NGM plate in the presence of IOX-1. Embryos were collected  
458 in 96-well plates during four days and the sex was scored as described above.

459

460

461

462

463

464

465

466

467

468

469

470

471

472

473  
474  
475  
476  
477  
478  
479  
480  
481  
482  
483  
484  
485  
486  
487  
488  
489  
490  
491

**Supplementary Figure S1**

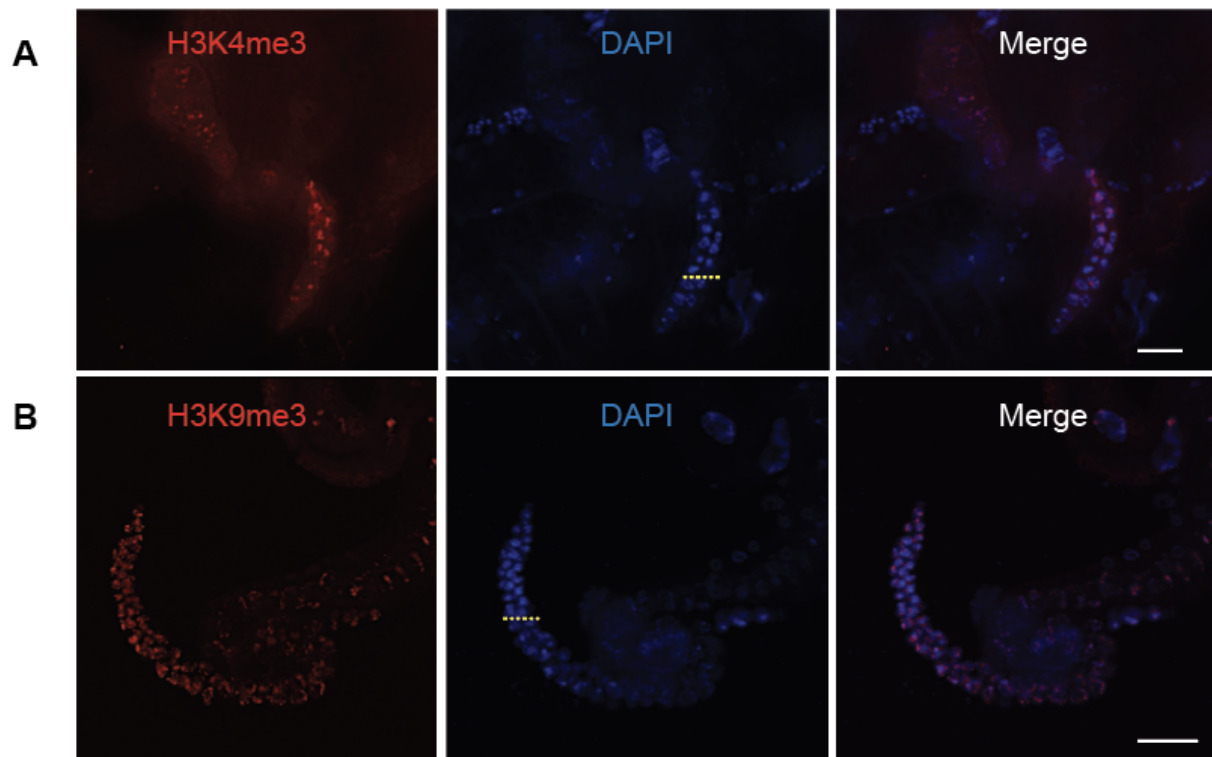

492

493

494 **Figure S1.** IOX-1 changes the histone methylation patterns in hermaphrodites in (+) CM plates.

495 The mitotic germline has low levels of H3K4me3 (**A**) and high levels of H3K9me3 (**B**). The

496 yellow dotted line in the pictures with DAPI staining represents the border between the mitotic

497 and meiotic part of the germline. In (**A**) the mitotic part is to the bottom of the yellow line, and in

498 (**B**) to top. Scale bar= 25  $\mu$ m.

499

500
